# Supplementary material for: A genome-wide portrait of pervasive drug contaminants
Source: PubMed Central journal article supplement (PMC8203678; doi:10.1038/s41598-021-91792-1), 2021-06-14
Supplement: 41598_2021_91792_MOESM3_ESM.pdf [file 41598_2021_91792_MOESM3_ESM.pdf]

# A genome-wide portrait of pervasive drug contaminants

Joseph Uche Ogbede, Guri Giaever and Corey Nislow

Supplementary figure 1

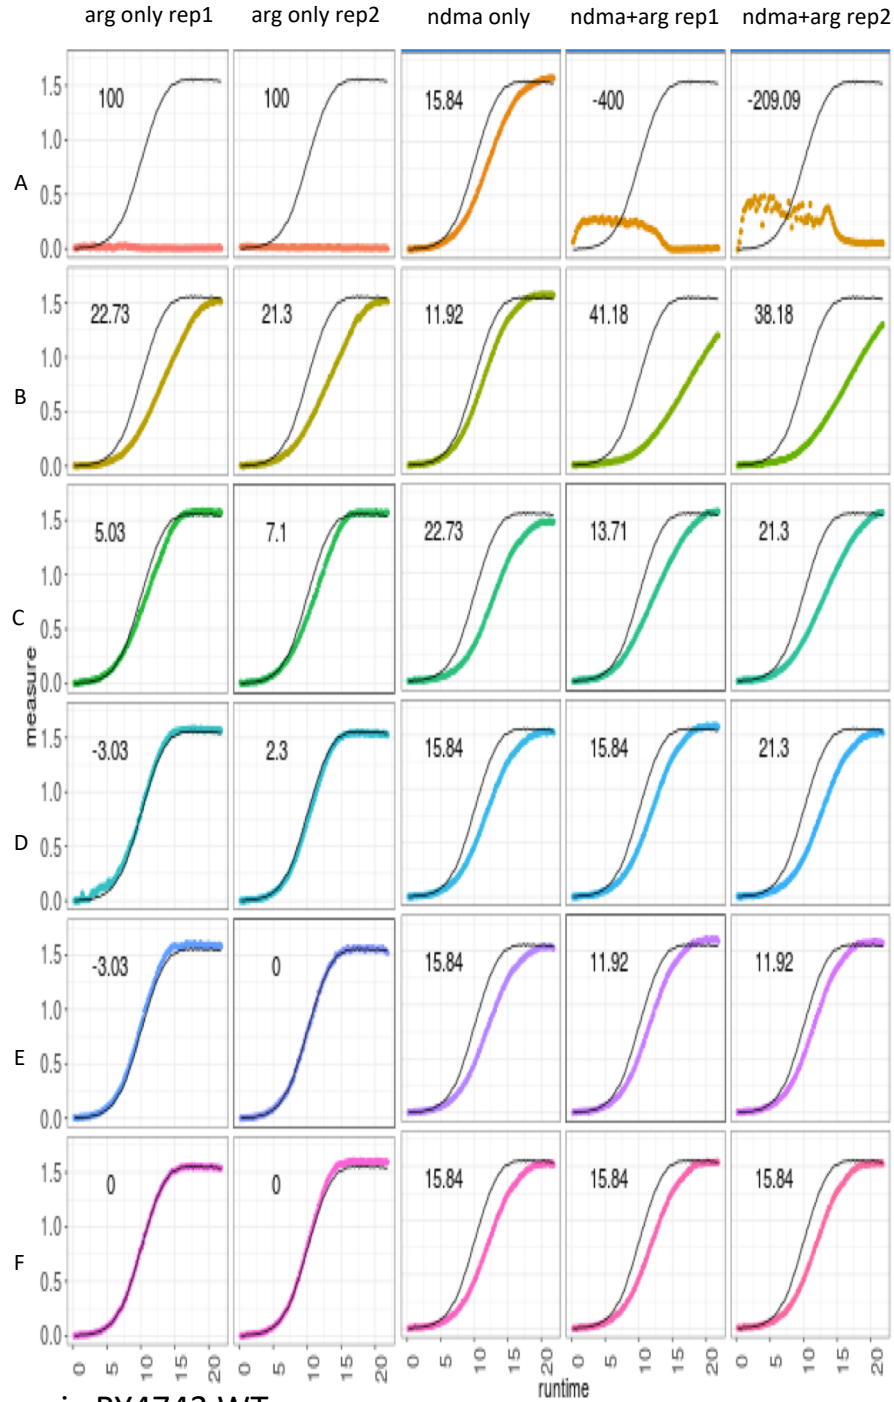

i. BY4743 WT

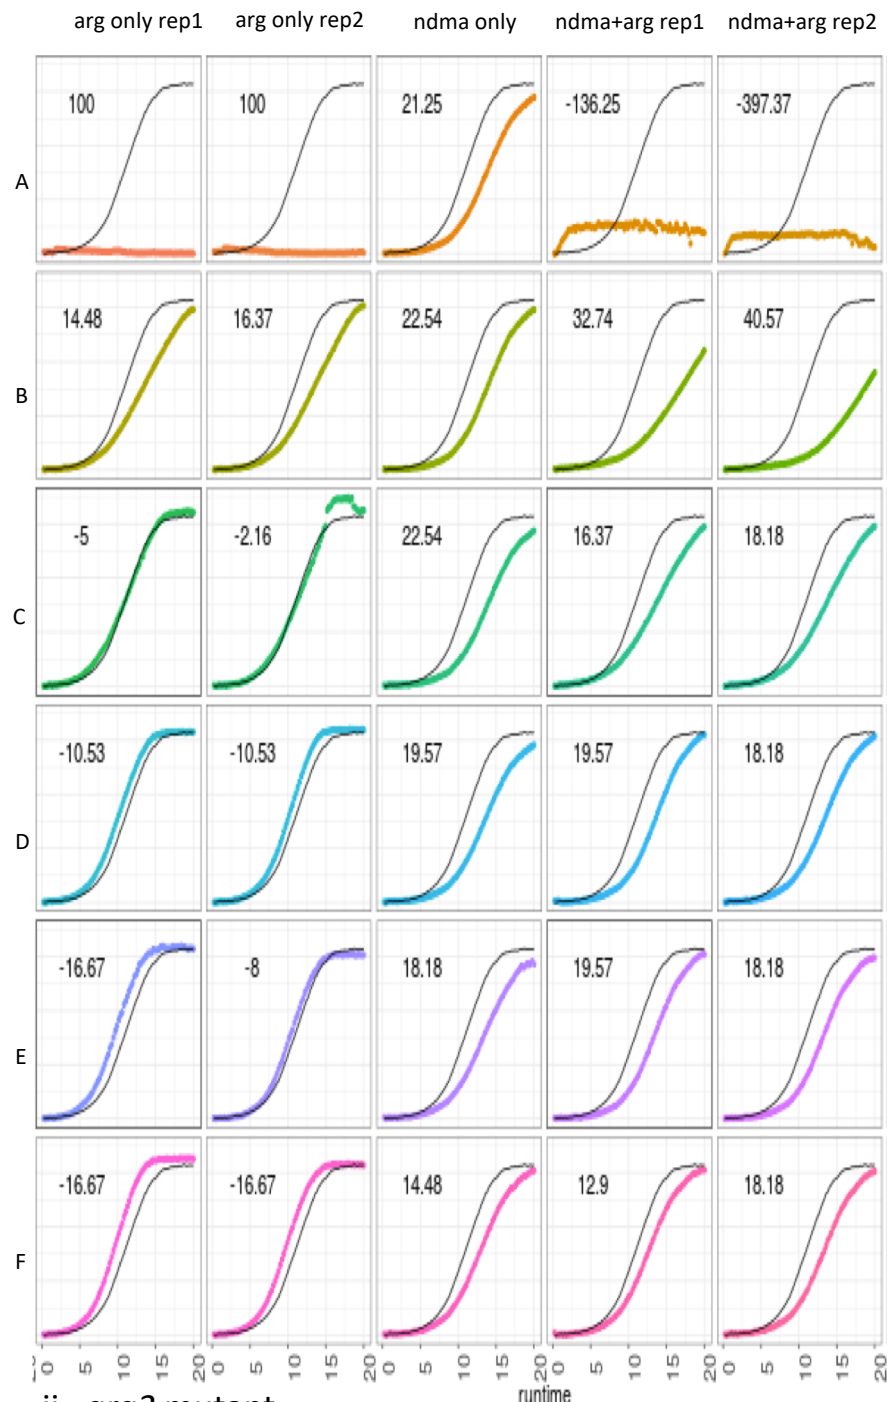

ii. *arg3* mutant
